# Supplementary material for: Predicting cognitive resilience from midlife lifestyle and multi-modal MRI: A 30-year prospective cohort study
Source: PLOS journal article supplement (doi:10.1371/journal.pone.0211273), 2019-02-19
Supplement: S3 (10.1371/journal.pone.0211273.s003) [file journal.pone.0211273.s003]

**S3 Table: Cross-sectional cognitive performance and hippocampal volume**

| Cognitive test                                | P value from likelihood test |
|-----------------------------------------------|------------------------------|
| Montreal Cognitive Assessment                 | 0.003                        |
| Hopkins Verbal Learning Test immediate recall | 0.06                         |
| Hopkins Verbal Learning Test delayed recall   | <0.0001                      |
| Semantic fluency                              | 0.01                         |
| Lexical fluency                               | 0.3                          |
| Rey- Osterrieth Complex Figure copy           | 0.9                          |
| Rey- Osterrieth Complex Figure immediate      | 0.5                          |
| Rey- Osterrieth Complex Figure delay          | 0.3                          |
| Trail Making Test A                           | 0.4                          |
| Trail Making Test B                           | 0.5                          |
| Digit span forwards                           | 0.2                          |
| Digit span backwards                          | 0.009                        |
| Digit span sequencing                         | 0.2                          |
| Digit coding                                  | <0.0001                      |

P-values result from hypothesis tests (likelihood tests) comparing regression models with and without hippocampal volume. N=511. Models were adjusted for: age, sex, FSIQ and social class. See Methods above: “Empirical justification for choice of resilience metrics: 1. Relationship between hippocampal size and cross-sectional cognitive performance”
